# Supplementary material for: New phosphonate based corrosion inhibitors for mild steel in hydrochloric acid useful for industrial pickling processes: experimental and theoretical approach
Source: Royal Society of Chemistry journal article supplement (doi:10.1039/c7nj01431g), 2017-01-01
Supplement: c7nj01431g1.pdf [file c7nj01431g1.pdf]

NMR Spectra of studied compounds:

APCI-1

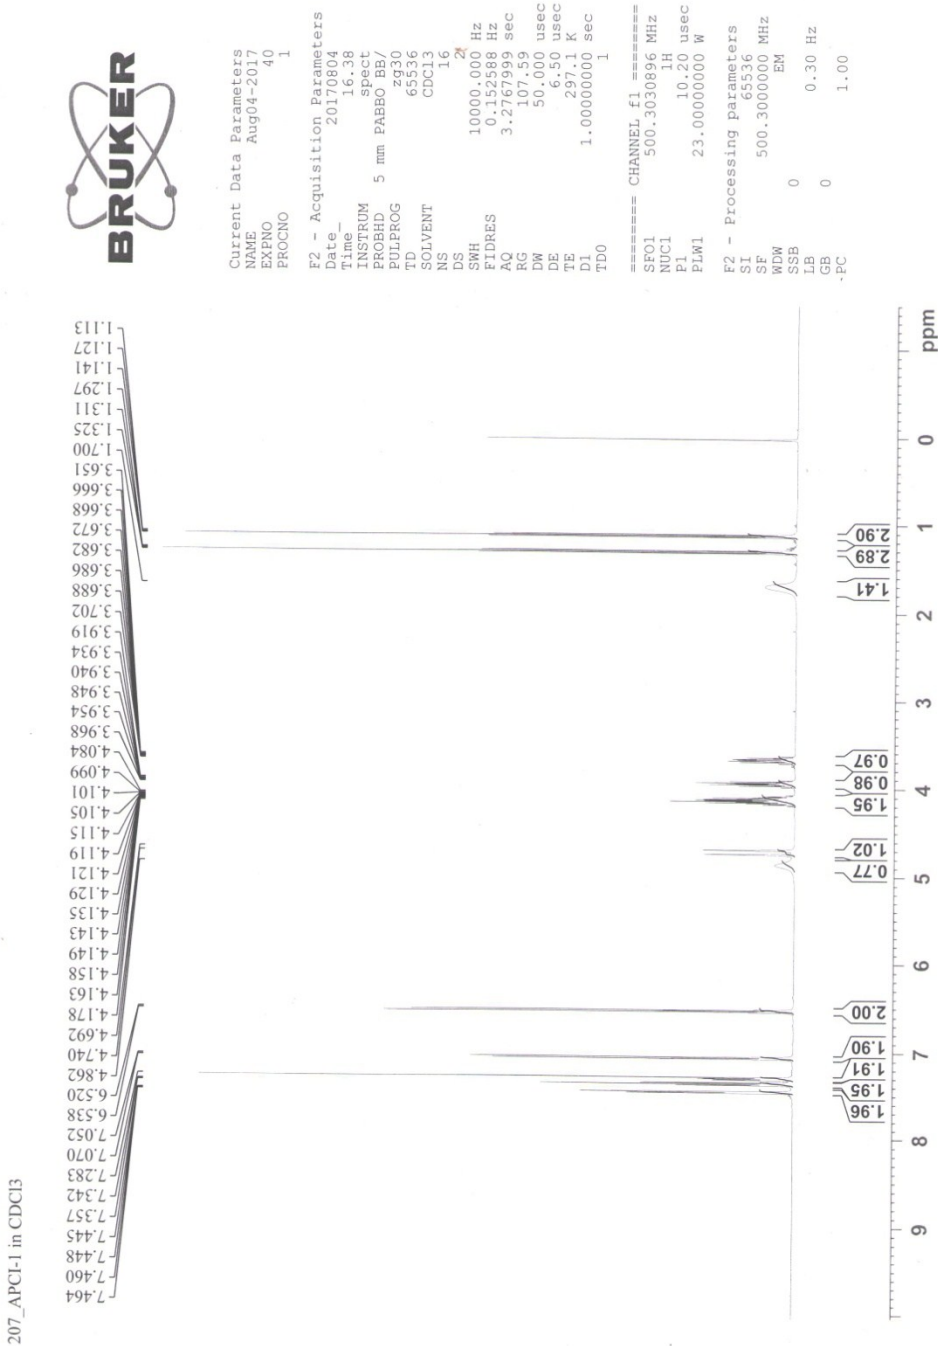

APCI-2

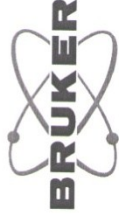

207\_APCI-2 in CDCl3

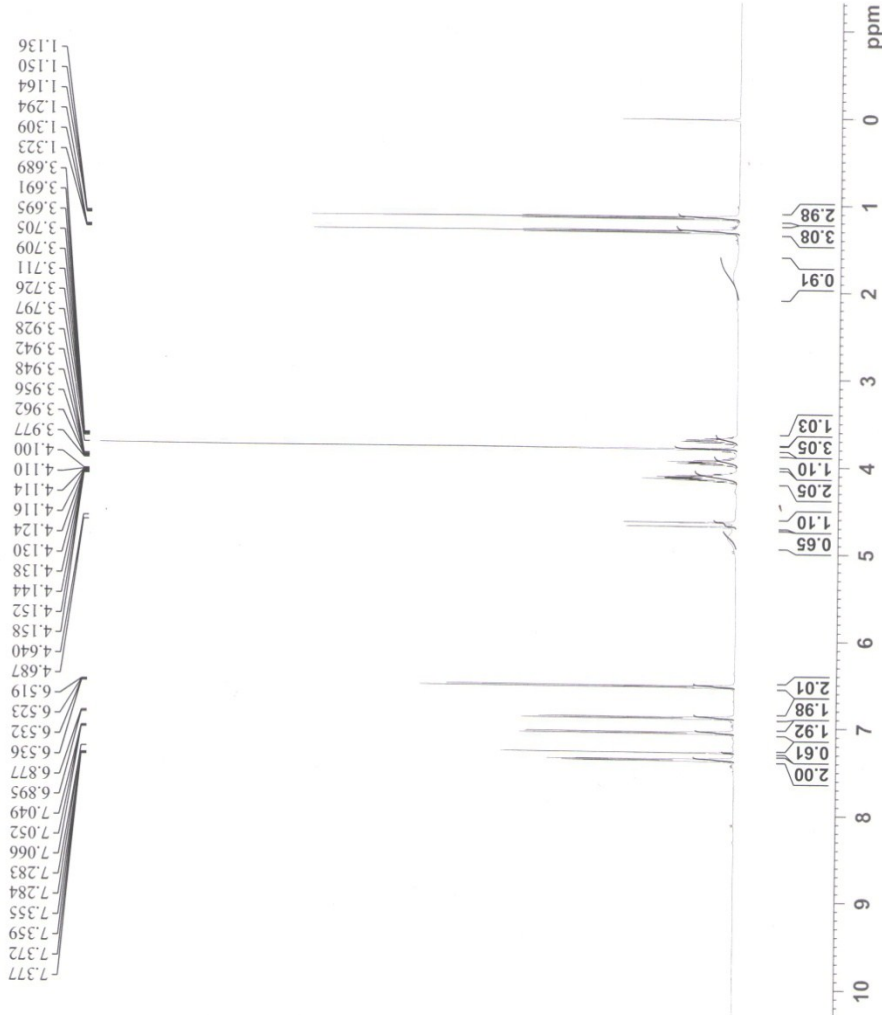

```

Current Data Parameters
NAME      Aug04-2017
EXPNO    50
PROCNO   1

F2 - Acquisition Parameters
Date_    20170804
Time     16.43
INSTRUM spect
PROBHD   5 mm PABBO BB/
PULPROG zg30
TD       65536
SOLVENT  CDCl3
NS       16
DS       2
SWH      10000.000 Hz
FIDRES   0.152588 Hz
AQ       3.2767999 sec
RG       87.18
DW       50.000 usec
DE       6.50 usec
TE       297.1 K
D1       1.00000000 sec
TDO      1

===== CHANNEL f1 =====
SF01    500.3030896 MHz
NUC1     1H
P1       10.20 usec
PLW1    23.00000000 W

F2 - Processing parameters
SI       65536
SF       500.3000000 MHz
WDW      EM
SSB      0
LB       0.30 Hz
GB       0
PC       1.00
    
```

APCI-3

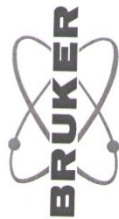

Current Data Parameters  
 NAME Aug11-2017  
 EXPNO 50  
 PROCNO 1

F2 - Acquisition Parameters  
 Date\_ 20170811  
 Time 15.20  
 INSTRUM spect  
 PROBHD 5 mm PABBO BB/  
 PULPROG zg30  
 TD 65536  
 SOLVENT CDCl3  
 NS 16  
 DS 2  
 SWH 10000.000 Hz  
 FIDRES 0.152588 Hz  
 AQ 3.2767999 sec  
 RG 121.34  
 DW 50.000 usec  
 DE 6.50 usec  
 TE 296.4 K  
 D1 1.00000000 sec  
 TDO 1

===== CHANNEL f1 =====  
 SF01 500.3030896 MHz  
 NUC1 1H  
 P1 10.20 usec  
 PLW1 23.00000000 W

F2 - Processing parameters  
 SI 65536  
 SF 500.3000107 MHz  
 WDW EM  
 SSB 0  
 LB 0  
 GB 0  
 FC 1.00

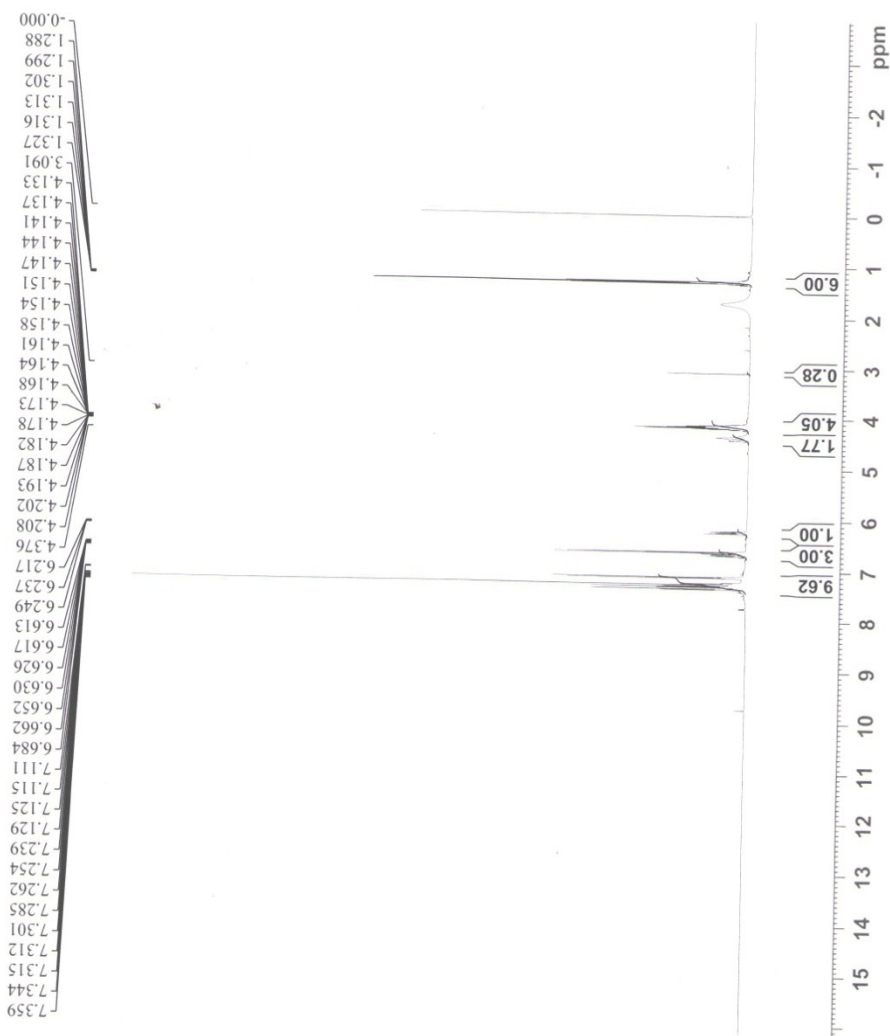

214\_APCI-3 in CDCl3
